# Supplementary material for: Hydrogenative Ring-Rearrangement of Furfural to Cyclopentanone over Pd/UiO-66-NO2 with Tunable Missing-Linker Defects
Source: MDPI journal article supplement (doi:10.3390/molecules26195736), 2021-09-22
Supplement: s1 [file s1]

# **Hydrogenative ring-rearrangement of furfural to cyclopentanone over Pd/UiO-66-NO<sub>2</sub> with tunable missing-linker defects**

**Chunhua Wang<sup>1,2,†</sup>, Zhiquan Yu<sup>1,2,†</sup>, Yuhao Yang<sup>1,2</sup>, Zhichao Sun<sup>1,2</sup>, Yao Wang<sup>1,2</sup>,  
Chuan Shi<sup>1</sup>, Ying-Ya Liu<sup>1,2,\*</sup>, Anjie Wang<sup>1,2,\*</sup>, Karen Leus<sup>3</sup> and Pascal Van Der Voort<sup>3</sup>**

<sup>1</sup> State Key Laboratory of Fine Chemicals, School of Chemical Engineering, Dalian University of Technology, Dalian 116024, P. R. China ; 274638799@mail.dlut.edu.cn (C.W.); yuzhiquan@dlut.edu.cn (Z.Y.); yyh917401123@163.com (Y.Y.); sunzhichao@dlut.edu.cn (Z.S.); wangyao@dlut.edu.cn (Y.W.); chuanshi@dlut.edu.cn (C.S.)

<sup>2</sup> Liaoning Key Laboratory of Petrochemical Technology and Equipment, Dalian University of Technology, Dalian 116012, P. R. China; Liaoning Key Laboratory of Petrochemical Technology and Equipment, Dalian University of Technology, Dalian 116012, P. R. China; 274638799@mail.dlut.edu.cn (C.W.); yuzhiquan@dlut.edu.cn (Z.Y.); yyh917401123@163.com (Y.Y.); sunzhichao@dlut.edu.cn (Z.S.); wangyao@dlut.edu.cn (Y.W.)

<sup>3</sup> Department of Chemistry, Ghent University, Krijgslaan 281-S3, 9000 Ghent, Belgium; karen.leus@ugent.be (K.L.); pascal.vandervoort@ugent.be (P.V.D.V.)

\* Correspondence: yingya.liu@dlut.edu.cn (Y.Y.L.); ajwang@dlut.edu.cn (A.W.); Tel.: +86-411-84986461

<sup>†</sup> Equal contribution

## Contents:

1. Experimental.
2. Figure S1. XRD patterns of (a) the simulated UiO-66-NO<sub>2</sub>, pristine UiO-66-NO<sub>2</sub>, and the UiO-66-NO<sub>2</sub> sample with different thermal treatment hours, (b) the simulated UiO-66, pristine UiO-66, UiO-66-7, and Pd/UiO-66-7.
3. Figure S2. SEM images of (a) UiO-66-NO<sub>2</sub>, (b) UiO-66-NO<sub>2</sub>-1, (c) UiO-66-NO<sub>2</sub>-3, (d) UiO-66-NO<sub>2</sub>-5, (e) UiO-66-NO<sub>2</sub>-7, (f) UiO-66-NO<sub>2</sub>-12, (g) UiO-66-NO<sub>2</sub>-24, (h) UiO-66, (i) UiO-66-7, (j) Pd/UiO-66-NO<sub>2</sub>-7, (k) Pd/UiO-66-7.
4. Figure S3. N<sub>2</sub> adsorption/desorption isotherms of (a) UiO-66-NO<sub>2</sub>-*t* with different thermal treatment time, (b) UiO-66-7, Pd/UiO-66-7, UiO-66-NO<sub>2</sub>-7, Pd/UiO-66-NO<sub>2</sub>-7, and Pd/UiO-66-NO<sub>2</sub>-7(IMP).
5. Table S1 Textural properties of the catalyst samples.
6. Figure S4. XRD patterns of fresh and spent Pd/UiO-66-NO<sub>2</sub>-7.
7. Figure S5. TEM image and particle size distribution for Pd/UiO-66-NO<sub>2</sub>-7 after four cycles.

## 1. Experimental

**Preparation of Pd UiO-66-NO<sub>2</sub>(IMP):** The Pd/UiO-66-NO<sub>2</sub>(IMP) catalyst was prepared by conventional impregnation method. 0.1 g of UiO-66-NO<sub>2</sub> was dispersed in 10 mL ethanol and sonicated for 30 min at room temperature. An excess amount of Pd solution was used to obtain an equal amount of Pd loading of 3 wt.%. 280  $\mu$ L aqueous solution of 1.5 wt.% PdCl<sub>2</sub> in diluted HCl was dissolved in ethanol, and the Pd-containing solution was added dropwise to the UiO-66-NO<sub>2</sub> suspension under vigorous stirring. The resulting mixture was stirred at 50 °C for 24 h. Then the solid product was collected by centrifugation and the supernatant was collected for complexometric titration of Pd. The obtained Pd<sup>2+</sup>/UiO-66-NO<sub>2</sub> was washed three times with ethanol, followed by drying at 120 °C under vacuum for 12 h, and then was transferred into a U-shaped quartz reactor and reduced in an H<sub>2</sub> flow (75 mL·min<sup>-1</sup>) at 200 °C for 4 h. After cooling down to room temperature in the presence of the H<sub>2</sub> flow, the resulting catalyst was passivated in a flow of 0.5 vol.% of O<sub>2</sub> in argon (20 mL·min<sup>-1</sup>) for 2 h before use (denoted as Pd/UiO-66-NO<sub>2</sub>(IMP)).

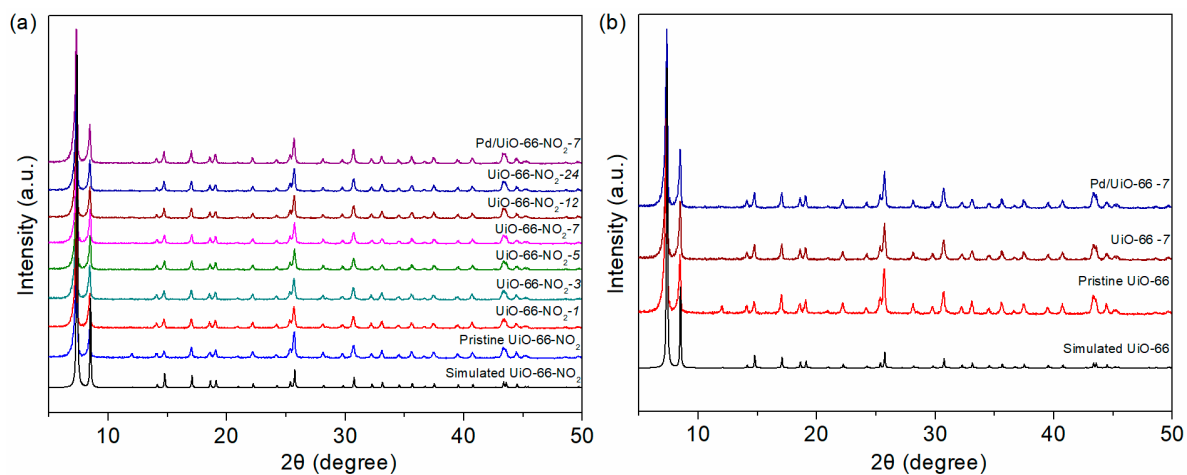

**Figure S1.** XRD patterns of (a) the simulated UiO-66-NO<sub>2</sub>, pristine UiO-66-NO<sub>2</sub>, and the UiO-66-NO<sub>2</sub> sample with different thermal treatment hours, (b) the simulated UiO-66, pristine UiO-66, UiO-66-7, and Pd/UiO-66-7.

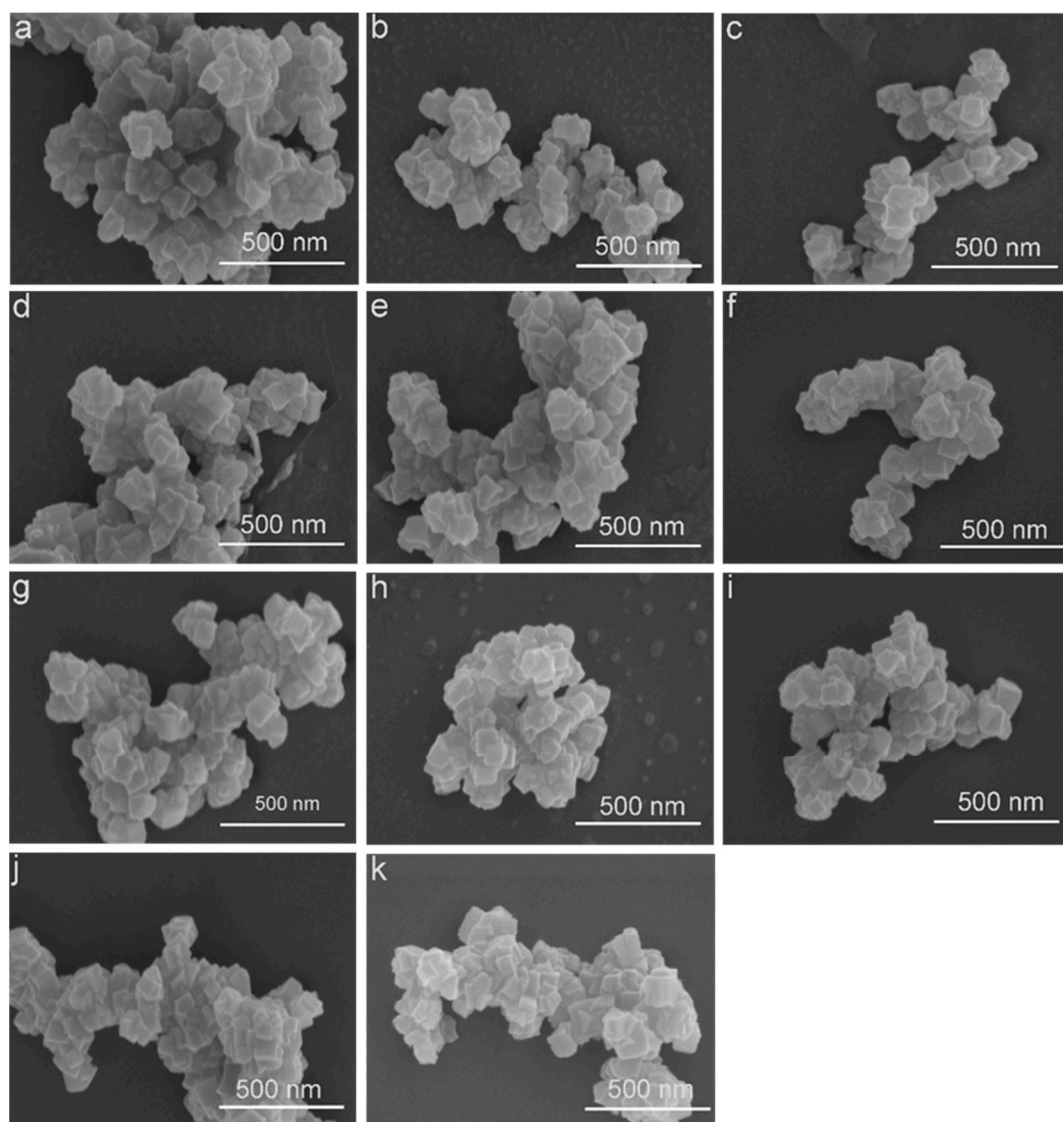

**Figure S2.** SEM images of (a) UiO-66-NO<sub>2</sub>, (b) UiO-66-NO<sub>2</sub>-1, (c) UiO-66-NO<sub>2</sub>-3, (d) UiO-66-NO<sub>2</sub>-5, (e) UiO-66-NO<sub>2</sub>-7, (f) UiO-66-NO<sub>2</sub>-12, (g) UiO-66-NO<sub>2</sub>-24, (h) UiO-66, (i) UiO-66-7, (j) Pd/UiO-66-NO<sub>2</sub>-7, (k) Pd/UiO-66-7.

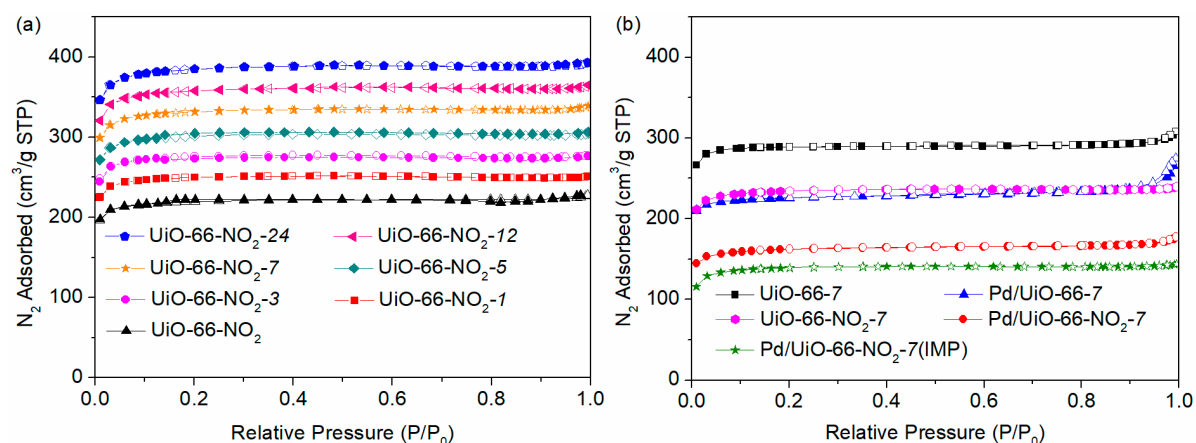

**Figure S3.** N<sub>2</sub> adsorption/desorption isotherms of (a) UiO-66-NO<sub>2</sub>-*t* with different thermal treatment time, (b) UiO-66-7, Pd/UiO-66-7, UiO-66-NO<sub>2</sub>-7, Pd/UiO-66-NO<sub>2</sub>-7, and Pd/UiO-66-NO<sub>2</sub>-7(IMP).

**Table S1.** Textural properties of the catalyst samples.

| Samples                         | S <sub>BET</sub>                   | V <sub>micro</sub>                  | V <sub>Total pore</sub>             |
|---------------------------------|------------------------------------|-------------------------------------|-------------------------------------|
|                                 | (m <sup>2</sup> ·g <sup>-1</sup> ) | (cm <sup>3</sup> ·g <sup>-1</sup> ) | (cm <sup>3</sup> ·g <sup>-1</sup> ) |
| UiO-66-NO <sub>2</sub>          | 735                                | 0.25                                | 0.35                                |
| UiO-66-NO <sub>2</sub> -1       | 741                                | 0.26                                | 0.35                                |
| UiO-66-NO <sub>2</sub> -3       | 751                                | 0.26                                | 0.35                                |
| UiO-66-NO <sub>2</sub> -5       | 757                                | 0.27                                | 0.36                                |
| UiO-66-NO <sub>2</sub> -7       | 784                                | 0.28                                | 0.37                                |
| UiO-66-NO <sub>2</sub> -12      | 796                                | 0.28                                | 0.38                                |
| UiO-66-NO <sub>2</sub> -24      | 816                                | 0.29                                | 0.39                                |
| Pd/UiO-66-NO <sub>2</sub> -7    | 563                                | 0.18                                | 0.28                                |
| Pd/UiO-66-NO <sub>2</sub> (IMP) | 519                                | 0.16                                | 0.27                                |

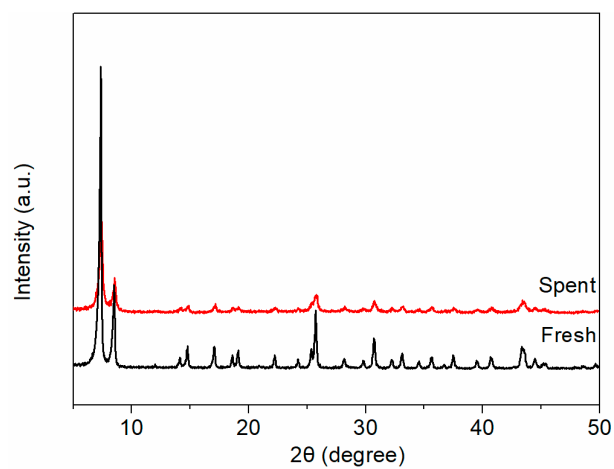

**Figure S4.** XRD patterns of fresh and spent Pd/UiO-66-NO<sub>2</sub>-7.

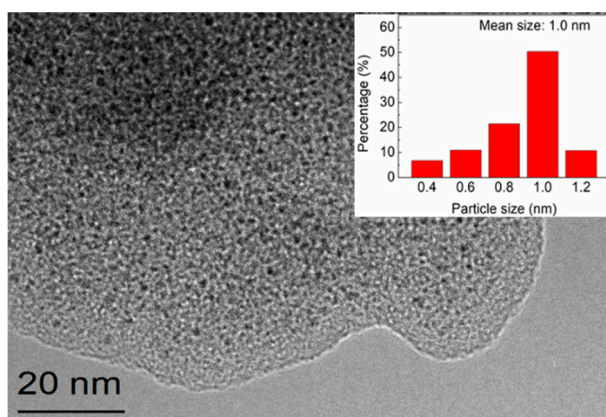

**Figure S5.** TEM image and particle size distribution for Pd/UiO-66-NO<sub>2</sub>-7 after four cycles.
